# Supplementary material
Source: Royal Society of Chemistry journal article supplement (doi:10.1039/d6lp00028b)
Supplement: d6lp00028b1.pdf [file d6lp00028b1.pdf]

*Supporting Information*

**Phase Morphology–Structure–Property–Recyclability Relationships of  
Dynamically Crosslinked Thiol-Ene Photopolymers**

Mengdi Chen,<sup>a</sup> Saleh Alfarhan,<sup>a</sup> Reyna Stockwell,<sup>a</sup> Kailong Jin<sup>a,b,\*</sup>

<sup>a</sup>*Chemical Engineering, School for Engineering of Matter, Transport and Energy,*

*Arizona State University, Tempe, AZ 85287, USA*

<sup>b</sup>*Biodesign Center for Sustainable Macromolecular Materials and Manufacturing,*

*Arizona State University, Tempe, AZ 85287, USA*

*\*To whom correspondence should be addressed: [kailong.jin@asu.edu](mailto:kailong.jin@asu.edu)*

## Additional Characterizations and Results

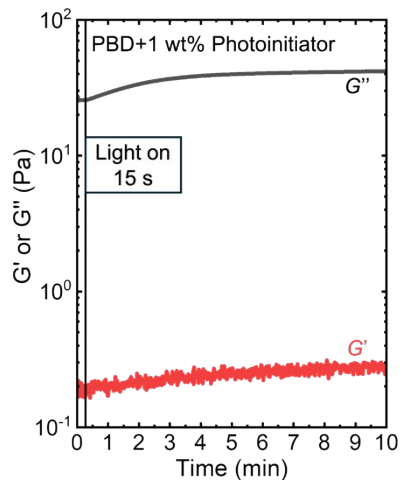

**Figure S1.** Photo-rheological analysis of neat PBD (containing 1 wt% photoinitiator) under UV irradiation (i.e., 10 mW/cm<sup>2</sup>), showing the evolution of  $G'$  and  $G''$  over time.

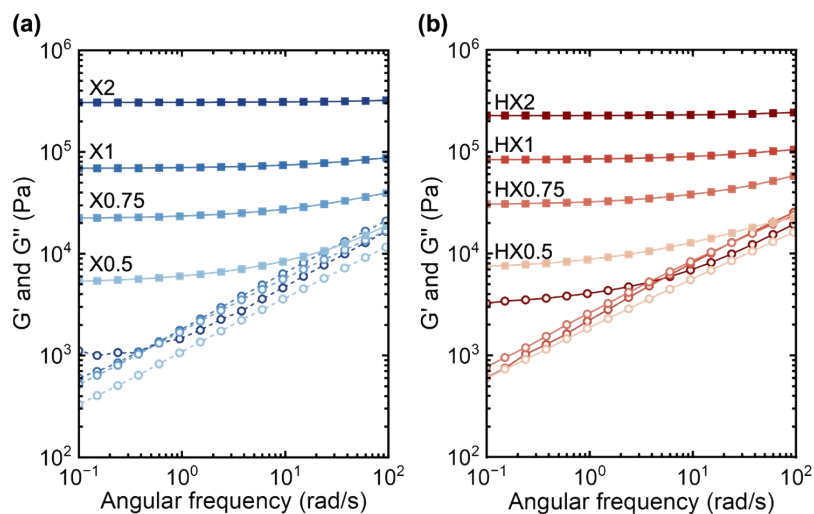

**Figure S2.** Room-temperature oscillatory rheological frequency sweep results for photocured PBD-G4 networks: **(a)** Phase-separated X0.5-X2 and **(b)** Phase-mixed HX0.5-HX2 samples. Solid symbols with solid lines denote the storage modulus ( $G'$ ), and open symbols with dashed lines denote the loss modulus ( $G''$ ).

## Reactivity study of 1,4- and 1,2-unsaturation in PBD with thiol groups

The chemical composition of polybutadiene (PBD) was analyzed by  $^1\text{H}$  NMR spectroscopy to determine the relative abundance of 1,4- and 1,2-unsaturation. As shown in **Figure S3**, the protons associated with 1,4-main-chain and 1,2-side-chain vinyl unsaturation give rise to distinct resonances (peaks **b** and **c**, respectively). Integration of these signals yielded an integral ratio of **b:c**  $\approx$  7.24:1.00, corresponding to approximately 88 mol% 1,4-unsaturation and 12 mol% 1,2-unsaturation. Based on the reported number-average molecular weight of PBD (5000 g/mol), this composition corresponds to an average of  $\sim$ 81 moles of 1,4-double bonds and  $\sim$ 11 moles of 1,2-vinyl double bonds per mole of PBD chains.

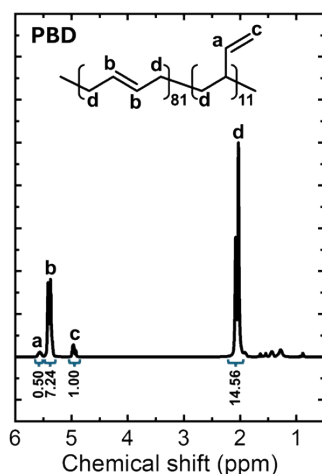

**Figure S3.**  $^1\text{H}$  NMR spectrum of PBD in chloroform- $d$ .

To evaluate the relative reactivity of 1,4- and 1,2-unsaturation toward thiol-ene addition, a monofunctional thiol, 2-(2-methoxyethoxy)ethanethiol (ME), was used as a model compound (**Figure S4**). PBD and ME were mixed at two PBD:ME molar ratios of 1:1 and 1:5, both with 1 wt% photoinitiator, and irradiated by UV light at 10 mW/cm $^2$  for 5 min per side. **Figure S5a** illustrates the thiol-ene photopolymerization between PBD and ME.  $^1\text{H}$  NMR spectra were collected before and after UV irradiation (**Figure S5b-e**). For quantitative analysis, the methyl

protons of ME were used as an internal reference and normalized to an integral value of 1.

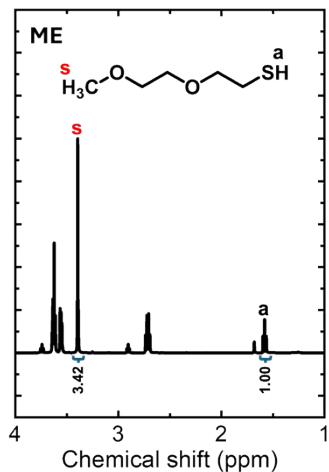

**Figure S4.**  $^1\text{H}$  NMR spectrum of ME in chloroform-d.

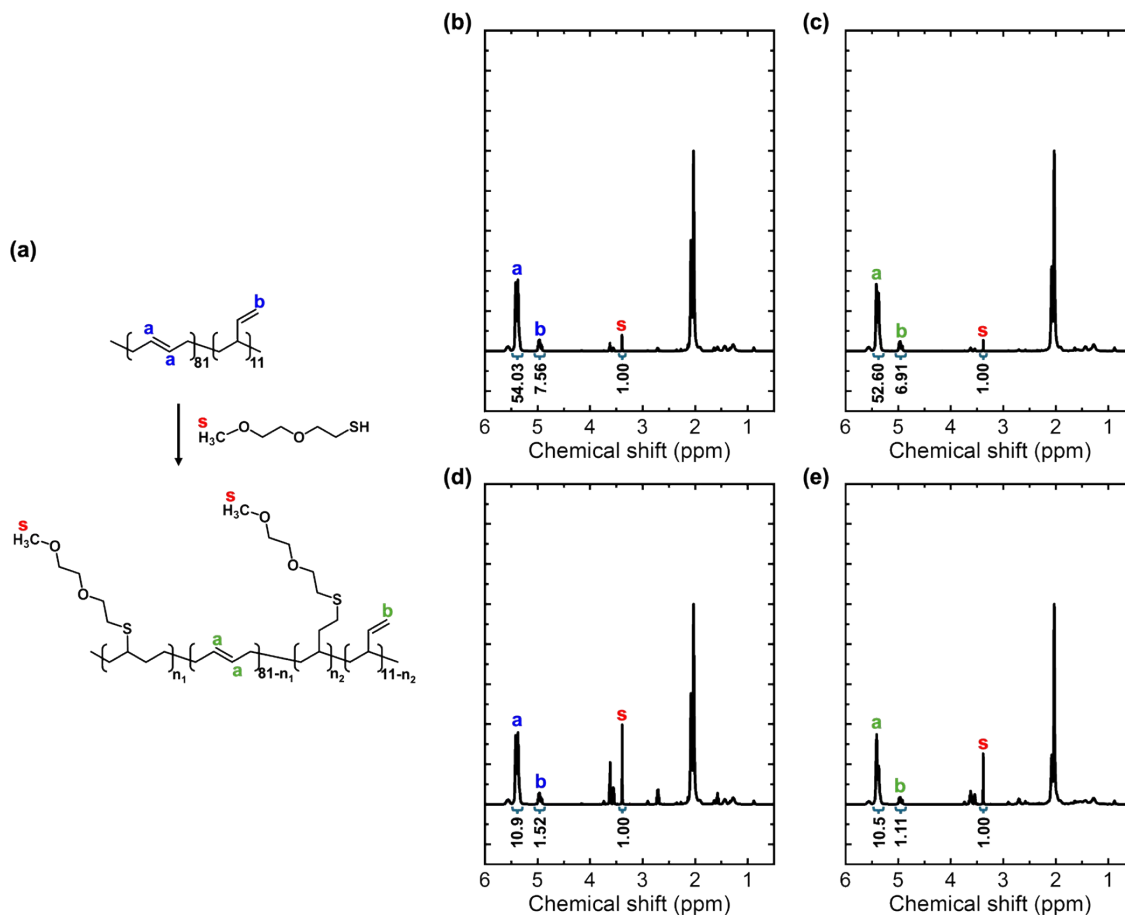

**Figure S5.** (a) Scheme of the reaction between PBD and ME;  $^1\text{H}$  NMR spectra of PBD:ME = 1:1 (b) before and (c) after curing in chloroform-d;  $^1\text{H}$  NMR spectra of PBD:ME = 1:5 (d) before and (e) after curing in chloroform-d.

After photopolymerization, the thiol groups in ME were completely consumed under the applied thiol–ene reaction conditions based on the  $^1\text{H}$  NMR spectra (**Figure S5**). The proton signals corresponding to both 1,4- and 1,2-unsaturation (peaks **a** and **b** in **Figure S5**) decreased relative to the reference peak **s**, indicating that both types of double bonds participated in thiol–ene addition. Notably, the ratio of the integrals associated with 1,4- to 1,2-unsaturation increased after curing, demonstrating preferential consumption of 1,2-vinyl double bonds. The relative reactivity ratio (RR) was estimated by comparing the fractional consumption of 1,2- and 1,4-double bonds under identical conditions. The calculated RR values were approximately 18 and 10 for PBD:ME molar ratios of 1:1 and 1:5, respectively. An average RR of  $\sim 14$  was thus adopted to represent the relative reactivity of 1,2- versus 1,4-unsaturation toward thiol–ene addition.

$$RR = \left\{ \frac{[1,2-]_b - [1,2-]_f}{[1,2-]_b} \right\} / \left\{ \frac{[1,4-]_b - [1,4-]_f}{[1,4-]_b} \right\}$$

$$[1,2-]_b = \frac{[b]}{[a] + [b]} \times 92$$

$$[1,4-]_b = \frac{[a]}{[a] + [b]} \times 92$$

$$[1,2-]_f = \frac{[b]}{[a] + [b]} \times (92 - x)$$

$$[1,4-]_f = \frac{[a]}{[a] + [b]} \times (92 - x)$$

Where RR is the reactivity ratio of 1,2-unsaturation to 1,4-unsaturation towards thiol groups,  $[1,2-]_b$  and  $[1,4-]_b$  represent the concentrations of 1,2- and 1,4-type carbon–carbon double bonds before curing, while  $[1,2-]_f$  and  $[1,4-]_f$  represent their corresponding concentration after curing, respectively. The parameter  $x$  denotes the molar ratio between ME and PBD. **[a]** and **[b]** correspond to the integral value of 1,4- and 1,2-unsaturation signals, where blue and green refer the spectra collected before and after curing, respectively.

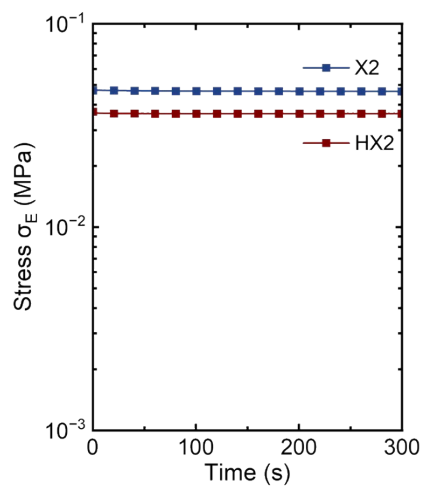

**Figure S6.** Stress relaxation behavior of X2 and HX2 measured at room temperature under 5% strain.

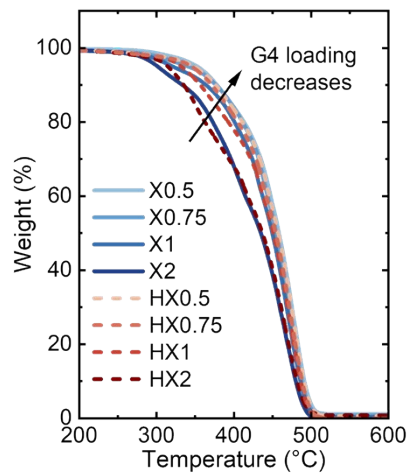

**Figure S7.** TGA spectra of photocured PBD-G4 networks: Phase-separated X0.5-X2 vs. Phase-mixed HX0.5-HX2 samples.
